# Supplementary material
Source: publisher site journal article supplement (https://www.dovepress.com/article/205163)
Supplement: Supplementary file 1 [file get_supplementary_file.php]

1 **Appendix 1**

2

Table S1. EPE characteristics.

| Baseline characteristics                                     | EPE-positive (n=81) | EPE-negative (n=62) |
|--------------------------------------------------------------|---------------------|---------------------|
| Total numbers of EPE*                                        | 82                  | 65                  |
| Species <sup>1</sup> (%)                                     |                     |                     |
| - <i>Escherichia coli</i>                                    | 78 (95)             | 56 (86)             |
| - <i>Klebsiella</i> spp.                                     | 4 (5)               | 8 (13)              |
| - <i>Proteus</i> spp.                                        | 0 (0)               | 1 (2)               |
| Phenotype* (%)                                               |                     |                     |
| -ESBL class A                                                | 77 (94)             | 57 (86)             |
| -AmpC                                                        | 3 (4)               | 7 (11)              |
| -ESBL class A + AmpC                                         | 2 (2)               | 1 (2)               |
| Antibiotic resistance* (%) <sup>2</sup>                      |                     |                     |
| -ciprofloxacin                                               | 18 (22)             | 6 (10)              |
| -trimethoprim/sulfamethoxazole                               | 8 (10)              | 16 (26)             |
| -ciprofloxacin + trimethoprim/sulfamethoxazole               | 44 (54)             | 27 (44)             |
| -Susceptible to ciprofloxacin + trimetoprim/sulfamethoxazole | 12 (15)             | 16 (25)             |

<sup>1</sup>All data were collected at the time of inclusion, *i.e.*, when faecal culture was obtained, except for\* which denotes original EPE-positive culture. All percentages are rounded up to the nearest integer.

Abbreviations: ESBL = Extended spectrum β-lactamase; EPE = Extended spectrum β-lactamase producing *Enterobacteriaceae*. AmpC = ampicillinase C

<sup>2</sup>Total number of strains in the ESBL-positive group and ESBL-negative group 82 and 65, respectively.

3

4

5

Table S2. Baseline characteristics of the study population based on medical records and questionnaires regarding diseases classified according to Charlson comorbidity index

| Baseline characteristic                      | EPE-positive (n=76) | EPE-negative (n=67) | P values |
|----------------------------------------------|---------------------|---------------------|----------|
| Charlson comorbidity index, median (range)   | 1 (0-7)             | 0 (0-5)             |          |
| Diabetes mellitus (%)                        | 14 (19)             | 5 (8)               | 0.082    |
| Liver disease (%)                            | 0 (0)               | 1 (2)               | 0.469    |
| Malignant cancer (%)                         | 11 (15)             | 13 (20)             | 0.504    |
| Acquired immunodeficiency syndrome (%)       | 0 (0)               | 0 (0)               |          |
| Chronic kidney disease (%)                   | 3 (4)               | 2 (3)               | 1.000    |
| Congestive heart failure (%)                 | 7 (10)              | 1 (2)               | 0.065    |
| Previous myocardial infarction (%)           | 6 (8)               | 4 (6)               | 0.749    |
| Chronic obstructive pulmonary disease (%)    | 5 (7)               | 7 (11)              | 0.549    |
| Peripheral vascular disease (%)              | 3 (4)               | 2 (3)               | 1.000    |
| Stroke or transient ischemic attack (%)      | 7 (10)              | 5 (8)               | 0.769    |
| Hemiplegia (%)                               | 4 (6)               | 1 (2)               | 0.369    |
| Connective tissue- or autoimmune disease (%) | 3 (4)               | 2 (3)               | 1.000    |
| Peptic ulcer (%)                             | 3 (4)               | 1 (2)               | 0.622    |

Charlson comorbidity index according to original reference and validation.<sup>42,43</sup> Excluded variables from original index; age and dementia as the latter is a criterion of exclusion in our study. All calculations are based on the weighted data. All counts are rounded to the nearest integer. Due to rounding, there are small variations in the number of patients included in each test. All percentages are rounded up to the nearest integer. ESBL = Extended spectrum β-lactamase.

6

7

8

9

10

11

12  
13

Table S3. Baseline characteristics of the study population based on questionnaires.

| Baseline characteristics                    | Responding <sup>1</sup> no (%) | EPE-positive <sup>2</sup> no (%) | EPE-negative <sup>3</sup> no (%) |
|---------------------------------------------|--------------------------------|----------------------------------|----------------------------------|
| Travel to Africa and/or Asia within 2 years | 122 (87)                       | 18 (27)                          | 24 (44)                          |
| Abdominal pain and/or altered bowel habits  | 124 (89)                       | 24 (34)                          | 26 (47)                          |
| Domestic household animal                   | 124 (89)                       | 23 (34)                          | 20 (36)                          |
| Occupation                                  | 117 (84)                       |                                  |                                  |
| -Unemployed/sick leave                      |                                | 3 (5)                            | 2 (4)                            |
| -Working                                    |                                | 22 (34)                          | 21 (44)                          |
| -Studying                                   |                                | 4 (6)                            | 0 (0)                            |
| -Retired                                    |                                | 36 (54)                          | 29 (58)                          |
| Number of persons in household              | 121 (86)                       |                                  |                                  |
| -Single household                           |                                | 13 (20)                          | 17 (32)                          |
| -2 persons                                  |                                | 47 (72)                          | 27 (50)                          |
| -3 persons                                  |                                | 4 (6)                            | 4 (7)                            |
| -More than 3 persons                        |                                | 2 (3)                            | 7 (13)                           |
| Known EPE-carrier in household <sup>4</sup> | 114 (81)                       | 3 (5)                            | 1 (2)                            |
| Knowledge of EPE-carriage                   | 122 (87)                       | 37 (57)                          | 24 (44)                          |
| Vegetarian                                  | 123 (88)                       | 1 (2)                            | 0 (0)                            |
| Post-secondary education                    | 121 (86)                       | 35 (54)                          | 25 (46)                          |

All data were collected originating at time of inclusion, *i.e.*, when fecal culture was collected. <sup>1</sup>Number of patients responding to the questionnaire of 140 possible. <sup>2</sup>Percentage calculated based on the total amount of replies within the cohort consisting of ESBL-positive patients. <sup>3</sup>Percentage calculated based on the total number of replies within the cohort of ESBL-negative patients. <sup>4</sup>Other than patient included in the study. All percentages are rounded up to the nearest integer. ESBL = Extended spectrum  $\beta$ -lactamase. EPE = Extended spectrum  $\beta$ -lactamase producing *Enterobacteriaceae*.

14  
15  
16

Table S4. Comparison of baseline characteristics between the patients included in the study and patients unwilling to participate

| Baseline characteristic                                               | Patients included (n=143) | Patients not included (n=677) | P values     |
|-----------------------------------------------------------------------|---------------------------|-------------------------------|--------------|
| Age, median (range)                                                   | 67 (19-87)                | 60                            |              |
| Female sex (%)                                                        | 92 (64)                   | 456 (67)                      | 0.4858       |
| Charlson comorbidity index, median (range)                            | 0 (0-7)                   | 0 (0-8)                       |              |
| History of EPE-infection (%)*                                         | 116 (81)                  | 458 (68)                      | <b>0,001</b> |
| Urological intervention within 6 months <sup>1</sup> (%)*             | 36 (25)                   | 129 (19)                      | 0,097        |
| Resistance against ciprofloxacin + trimethoprim/sulfamethoxazole (%)* | 71 (50)                   | 250 (37)                      | <b>0.01</b>  |

Charlson comorbidity index according to original reference and validation. Excluded variables from original index; age and dementia as the latter is a criterion of exclusion in our study. All percentages are rounded up to the nearest integer. ESBL = Extended spectrum  $\beta$ -lactamase.

<sup>1</sup>Minor or major invasive procedure on bladder, prostate and/or kidney and cystoscopy. EPE = Extended spectrum  $\beta$ -lactamase producing *Enterobacteriaceae*. \*Variable based on preliminary regression analysis.

17  
18

19  
20

Table S5. Computed statistical weights

| Variable                                                                                                             | Weight |
|----------------------------------------------------------------------------------------------------------------------|--------|
| History of EPE-infection and Bacteria resistant to both Ciprofloxacin and Trimethoprim/Sulfamethoxazole <sup>1</sup> | 0.6976 |
| History of EPE-infection and Bacteria not resistant to both Ciprofloxacin and Trimethoprim/Sulfamethoxazole          | 1.0070 |
| No history of EPE-infection and Bacteria resistant to both Ciprofloxacin and Trimethoprim/Sulfamethoxazole           | 1.0771 |
| No history of EPE-infection and Bacteria not resistant to both Ciprofloxacin and Trimethoprim/Sulfamethoxazole       | 2.4589 |

All data were collected originating at time of inclusion, *i.e.*, when fecal culture was collected, except <sup>1</sup> which denotes original EPE-positive culture. EPE = Extended spectrum  $\beta$ -lactamase producing *Enterobacteriaceae*.

21  
22  
23  
24  
25

## 26 Variable coding – Steering document

### 27 Dependent variable

28 *ESBL-positive* (1): Prevalence of EPE-strain in at least one fecal culture collected with a  
29 minimum time period of three months from the first EPE positive culture.

30 *ESBL-negative* (0): EPE negative in fecal culture on follow-up.

### 31 Independent variables, bacterial characteristics at original EPE positive culture

32 *Bacterial species*: *Escherichia coli* (1) / Other species (0)

33 *Phenotype*: ESBL class A (1) / AmpC (0)

34 *Antibiotic resistance*: Ciprofloxacin (1) / Trimethoprim/Sulfamethoxazole (2) / Ciprofloxacin  
35 + Trimethoprim/Sulfamethoxazole (3) / Susceptible to Ciprofloxacin +  
36 Trimethoprim/Sulfamethoxazole (0)

37 *Place of infection and/or colonization*: Urine (1) / Rectum (2) / Blood (0)

38 *Infection or colonization*: Infection (1) / Colonization (0)

### 39 Independent variables at the time of inclusion, *i.e.* submitted fecal sample

40 *Sex*: Female (1) / Male (0)

41 *Age*:  $\geq 70$  years (1) /  $< 70$  years (0)

42 *EPE-infection and/or colonization prior to January 2016*: Yes (1) / No (0)

43 *Urological intervention*: (Maximum six months prior to inclusion. Interventions including  
44 minor and/or major surgery on bladder, prostate and/or kidney and cystoscopy) Yes (1) / No  
45 (0)

46 *Inflammatory bowel disease*: Yes (1) / No (0)

47 *Charlson comorbidity index*: (According to original Charlson minus age and dementia) points  
48 are coded as variables, *i.e.* 0=0, 1=1 and so forth.

49 *Inpatient hospital care*: (Maximum two years prior to inclusion) Yes (1) / No (0)

- 50 *Urinary catheter or intermittent clean catheterization:* Yes (1) / No (0)
- 51 *Antibiotic treatment:* (Maximum two years prior to inclusion) Yes (1) / No (0)
- 52 *Overall medications:* 1-2 medications (1) / 3 or more medications (2) / No medications (0)
- 53 *Ongoing proton pump inhibitor treatment:* Yes (1) / No (0)
- 54 *Ongoing immunosuppressive treatment:* (Including corticosteroids and methotrexate) Yes (1)
- 55 / No (0)
- 56 **Independent variables at the time of inclusion, i.e. submitted fecal sample. Data solely**
- 57 **from questionnaires**
- 58 *International travel:* (Maximum two years prior to inclusion outside the Nordic countries)
- 59 Europe (1) / Asia (2) / Africa (3) / North America (4) / South America (5) / Antarctica (6) /
- 60 Oceania (7) / No international travel (0)
- 61 *Abdominal pain and/or altered bowel habits:* Yes (1) / No (0)
- 62 *Domestic animal:* Yes (1) / No (0)
- 63 *Occupation:* Working (1) / Studying (2) / Retired (3) / Unemployed or sick leave (0)
- 64 *Number of persons in household:* Two persons (1) / Three persons (2) / More than three
- 65 persons (3) / Single household (0)
- 66 *Known EPE carrier in household:* Yes (1) / No (0)
- 67 *Knowledge of EPE-carriage:* Yes (1) / No (0)
- 68 *Vegetarian:* Yes (1) / No (0)
- 69 *Post-secondary education:* Yes (1) / No (0)
- 70
- 71

72 **ACKNOWLEDGEMENTS**

73 Special thanks to associate professor Fredrik Resman, professor Svante Twetman, dr. Jonas  
74 Tverring, MSc Axel Ström and MSc Fredrik Nilsson, Mrs. Lena Hyllebusk and Mrs. Anita  
75 Eriksson. This work was supported by grants from the Thelma Zoéga and the Stig and Ragna  
76 Gorthon foundation.

77

78 **DISCLOSURES**

79 The authors have no conflict of interest to disclose.

80

81

82
